# Supplementary material
Source: PubMed Central journal article supplement (PMC3780903)
Supplement: 1308827110_pnas.201308827SI.pdf [file 1308827110_pnas.201308827SI.pdf]

# Supporting Information

Wibowo et al. 10.1073/pnas.1308827110

## SI Materials and Methods

**Purification of Human Folate Receptor  $\alpha$  Secreted from Sf9 Cells.** All data presented in the main text result from human folate receptors (hFRs) expressed and purified from Chinese Hamster Ovary (CHO) cells. In the initial stages of this work, two additional hFR $\alpha$  structures at acidic pH were determined with protein produced via standard techniques using a *Spodoptera frugiperda* insect cell (Sf9) baculovirus expression system. The first structure was determined using a construct design from which expressed protein contained no fusion tags and encoded hFR $\alpha$  lacking the C-terminal signal peptide that directs glycosyl-phosphatidylinositol (GPI) anchor attachment (hFR $\alpha$  residues 25–234). This protein was purified via folate affinity and size exclusion chromatography as described for hFRs from CHO cells and only protein from a single preparation crystallized in space group P6<sub>5</sub> at pH 5.5 (Table S1). Subsequent purifications and crystallization trials never yielded crystals. A second baculovirus was generated that encoded hFR $\alpha$  with its N-terminal signal peptide replaced by that of the honey bee melittin protein. Additionally, the C-terminal GPI anchor sequence was replaced with a hexahistidine affinity tag. hFR $\alpha$ -His<sub>6</sub> was purified via Ni-nitrilotriacetic acid-immobilized metal affinity, folate affinity, and size exclusion chromatography. hFR $\alpha$  purified using this construct crystallized, albeit not reproducibly, in space group P1 (Table S1).

**N-Glycan Variants of hFRs in Crystallization Trials.** Crystallization trials were conducted for both hFR $\alpha$  and hFR $\beta$  purified from CHO cells with three distinct N-glycosylation variants at each

site of glycan attachment: heterogeneous glycans, homogeneous Man<sub>9</sub>GlcNAc<sub>2</sub>-Asn, and homogeneous GlcNAc-Asn. When cells were cultured in standard growth medium, hFRs possessed a heterogeneous population of glycan structures at each N-glycan site owing to addition of monosaccharide units of varying identity in the late stages of maturation (e.g., galactose, N-acetyl galactose, sialic acid). To obtain homogeneous Man<sub>9</sub>GlcNAc<sub>2</sub> N-glycans, cells were grown in medium containing 1 mg/L kifunensine (Kif), a potent inhibitor of Golgi  $\alpha$ -mannosidase I (1, 2). The resulting high mannose structures are sensitive to processing by endoglycosidase H (EndoH), which cleaves between the first and second GlcNAc (1, 2). After EndoH processing, hFRs possessed a single GlcNAc at each N-glycan site. During crystallization trials, hundreds of unique conditions readily yielded needle- or rod-shaped crystals for both apo-hFR $\alpha$  and hFR $\alpha$ -ligand complexes with either heterogeneous or homogeneous Kif N-glycans. Unfortunately, none of these crystals gave rise to diffraction with Bragg spacings better than 20 Å. The apo-hFR $\alpha$  Kif-EndoH variant also crystallized at pH values from 4.5 to 6.0, and these crystals gave rise to the highest quality structure of the four models presented herein for apo-hFR $\alpha$  at acidic pH (designated Kif-EndoH in Table S1). Crystals of apo-hFR $\beta$  and hFR $\beta$  in complex with folate and antifolates were obtained with samples containing heterogeneous N-glycans and the high mannose glycans that result from cells grown in the presence of Kif. However, all structures of hFR $\beta$  were determined using crystals of hFR $\beta$  with heterogeneous N-glycans.

1. Elbein AD, Tropea JE, Mitchell M, Kaushal GP (1990) Kifunensine, a potent inhibitor of the glycoprotein processing mannosidase I. *J Biol Chem* 265(26):15599–15605.

2. Kaushal GP, Pastuszak I, Hatanaka K, Elbein AD (1990) Purification to homogeneity and properties of glucosidase II from mung bean seedlings and suspension-cultured soybean cells. *J Biol Chem* 265(27):16271–16279.



















**Table S1. X-ray crystallographic data for FR apo structures**

|                                        | Apo hFR $\beta$      | Apo hFR $\alpha$ Kif-EndoH                     | Apo hFR $\alpha$    | Apo hFR $\alpha$    |
|----------------------------------------|----------------------|------------------------------------------------|---------------------|---------------------|
| PDB ID                                 | 4KMY                 | 4KM6                                           | 4KMX                | 4KM7                |
| Expression host                        | CHO                  | CHO                                            | Sf9                 | Sf9                 |
| Crystallization pH*                    | 7.4                  | 5.5                                            | 5.5                 | 5.5                 |
| Data collection                        |                      |                                                |                     |                     |
| Space group                            | P6 <sub>1</sub>      | P 2 <sub>1</sub> 2 <sub>1</sub> 2 <sub>1</sub> | P6 <sub>5</sub>     | P 1                 |
| Cell dimensions                        |                      |                                                |                     |                     |
| a, b, c (Å)                            | a = 75.16, c = 97.27 | 36.52, 63.34, 71.17                            | 99.19, 99.19, 56.87 | 33.71, 55.38, 69.50 |
| $\alpha$ , $\beta$ , $\gamma$ (Å)      |                      |                                                |                     | 72.23, 86.95, 90.12 |
| Molecule per a.s.u                     | 1                    | 1                                              | 1                   | 2                   |
| Resolution                             | 50–1.80 (1.83–1.8)   | 50–1.55 (1.58–1.55)                            | 30–2.20 (2.24–2.2)  | 50–1.80 (1.83–1.80) |
| I/ $\sigma$ I                          | 15.4 (2.3)           | 15.3 (2.7)                                     | 13.8 (1.6)          | 10.3 (7.2)          |
| Completeness (%)                       | 100.0 (99.8)         | 98.3 (86.8)                                    | 96.4 (90.4)         | 97.8 (99.1)         |
| Redundancy                             | 7.8 (4.6)            | 5.7 (4.5)                                      | 5.4 (3.2)           | 3.4 (3.4)           |
| $R_{\text{sym}}$                       | 10.0 (55.6)          | 8.7 (49.5)                                     | 9.6 (57.4)          | 10.0 (18.0)         |
|                                        | Apo hFR $\beta$      | Apo hFR $\alpha$                               | Apo hFR $\alpha$    | Apo hFR $\alpha$    |
| Refinement                             |                      |                                                |                     |                     |
| Resolution (Å)                         | 50–1.8 (1.83–1.8)    | 32.4–1.55 (1.58–1.55)                          | 30–2.2 (2.26–2.2)   | 28.1–1.8 (1.84–1.8) |
| No. reflections                        |                      |                                                |                     |                     |
| Used for refinement                    | 28,939               | 23,197                                         | 15,746              | 42,731              |
| Used for $R_{\text{free}}$ calculation | 1,199                | 1,906                                          | 790                 | 1,980               |
| $R_{\text{factor}}$ (%)                | 16.4 (21.2)          | 16.8 (23.2)                                    | 17.2 (24.5)         | 22.2 (22.4)         |
| $R_{\text{free}}$ (%)                  | 19.3 (24.9)          | 19.9 (27.9)                                    | 19.9 (26.5)         | 26.9 (28.0)         |
| No. atoms                              |                      |                                                |                     |                     |
| Protein                                | 1,667                | 1,667                                          | 1,617               | 3,154               |
| Ligand                                 | NA                   | NA                                             | NA                  | NA                  |
| Metals                                 | 1                    | 1                                              | 2                   | 2                   |
| Carbohydrates                          | 14                   | 42                                             | 24                  | 56                  |
| Water molecules                        | 164                  | 127                                            | 162                 | 440                 |
| B-factors (Å <sup>2</sup> , average)   |                      |                                                |                     |                     |
| Protein                                | 31.2                 | 21.4                                           | 32.8                | 14.7                |
| Ligand                                 | NA                   | NA                                             | NA                  | NA                  |
| Metals                                 | 26.7                 | 16.4                                           | 30.9                | 13.5                |
| Carbohydrates                          | 39.1                 | 39.4                                           | 57.2                | 33.2                |
| Water molecules                        | 40.9                 | 28.5                                           | 39.5                | 26.6                |
| r.m.s. deviations                      |                      |                                                |                     |                     |
| Bond lengths (Å)                       | 0.009                | 0.007                                          | 0.004               | 0.006               |
| Bond angles (°)                        | 1.113                | 1.161                                          | 0.797               | 1.029               |

Values in parentheses are for the highest resolution shell. NA, not applicable.

\*Reported pH is measured value for the mixture of final protein buffer and crystallant solution.

**Table S2. X-ray crystallographic data for FR complex structures**

|                                        | hFR $\beta$ /folate  | hFR $\beta$ /methotrexate | hFR $\beta$ /aminopterin | hFR $\beta$ /pemetrexed |
|----------------------------------------|----------------------|---------------------------|--------------------------|-------------------------|
| PDB ID                                 | 4KMZ                 | 4KN0                      | 4KN1                     | 4KN2                    |
| Expression host                        | CHO                  | CHO                       | CHO                      | CHO                     |
| Crystallization pH*                    | 8.0                  | 8.0                       | 8.0                      | 8.2                     |
| Data collection                        |                      |                           |                          |                         |
| Space group                            | P6 <sub>1</sub> 22   | P6 <sub>1</sub> 22        | P6 <sub>1</sub> 22       | I4 <sub>1</sub> 22      |
| Cell dimensions                        |                      |                           |                          |                         |
| a, b, c (Å)                            | a = 96.86, c = 98.34 | a = 97.60, c = 99.37      | a = 97.08, c = 98.96     | a = 97.44, c = 348.11   |
| Molecule per a.s.u                     | 1                    | 1                         | 1                        | 3                       |
| Resolution                             | 50–2.3 (2.34–2.3)    | 50–2.10 (2.14–2.1)        | 50–2.3 (2.34–2.3)        | 50–2.6 (2.64–2.6)       |
| I/ $\sigma$ I                          | 22.0 (1.8)           | 16.8 (3.9)                | 12.4 (2.9)               | 16.2 (2.2)              |
| Completeness (%)                       | 95.2 (85.5)          | 100.0 (99.8)              | 98.4 (97.4)              | 100.0 (100.0)           |
| Redundancy                             | 11.1 (8.6)           | 8.7 (6.9)                 | 10.6 (10.2)              | 8.1 (8.2)               |
| R <sub>sym</sub>                       | 8.9 (48.9)           | 12.3 (49.5)               | 15.5 (59.8)              | 11.3 (67.5)             |
| Refinement                             |                      |                           |                          |                         |
| Resolution (Å)                         | 48.4–2.3 (2.39–2.3)  | 42.8–2.1 (2.21–2.1)       | 50–2.3 (2.34–2.3)        | 50–2.6 (2.64–2.6)       |
| No. reflections                        |                      |                           |                          |                         |
| Used for refinement                    | 12,030               | 16,841                    | 12,543                   | 26,486                  |
| Used for R <sub>free</sub> calculation | 1,203                | 987                       | 1,002                    | 1,341                   |
| R <sub>factor</sub> (%)                | 20.5 (28.4)          | 17.8 (20.9)               | 18.8 (20.1)              | 19.4 (24.5)             |
| R <sub>free</sub> (%)                  | 26.0 (36.4)          | 23.1 (26.8)               | 23.5 (25.8)              | 24.4 (30.2)             |
| No. atoms                              |                      |                           |                          |                         |
| Protein                                | 1,630                | 1,641                     | 1,656                    | 4,821                   |
| Ligand                                 | 32                   | 33                        | 32                       | 93                      |
| Metals                                 | 2                    | 3                         | 4                        | 6                       |
| Carbohydrates                          | 28                   | 56                        | 50                       | 42                      |
| Water molecules                        | 50                   | 228                       | 111                      | 115                     |
| B-factors (Å <sup>2</sup> , average)   |                      |                           |                          |                         |
| Protein                                | 42.4                 | 23.2                      | 34.9                     | 47.6                    |
| Ligand                                 | 42.8                 | 25.1                      | 38.6                     | 52.1                    |
| Metals                                 | 56.3                 | 44.08                     | 60.3                     | 56.7                    |
| Carbohydrates                          | 64.3                 | 53.3                      | 75.1                     | 39.6                    |
| Water molecules                        | 42.6                 | 33                        | 38.5                     | 42.3                    |
| r.m.s. deviations                      |                      |                           |                          |                         |
| Bond lengths (Å)                       | 0.006                | 0.013                     | 0.004                    | 0.008                   |
| Bond angles (°)                        | 0.93                 | 1.266                     | 0.823                    | 1.067                   |

Values in parentheses are for the highest resolution shell.

\*Reported pH is measured value for the mixture of final protein buffer and crystallant solution.

**Table S3. Thermodynamic analysis of folate and antifolate binding to FRs**

| Ligand                                        | pH  | K <sub>d</sub> (nM) | $\Delta G$ (kcal/mol) | $\Delta H$ (kcal/mol) | $-T\Delta S$ (kcal/mol) |
|-----------------------------------------------|-----|---------------------|-----------------------|-----------------------|-------------------------|
| hFR $\alpha$ thermodynamic binding parameters |     |                     |                       |                       |                         |
| Folic acid                                    | 7.4 | 0.0103 $\pm$ 0.0015 | -15.0 $\pm$ 0.1       | -27.7 $\pm$ 0.1       | 12.7 $\pm$ 0.1          |
|                                               | 6.5 | 21 $\pm$ 9          | -10.5 $\pm$ 0.3       | -25.2 $\pm$ 1.2       | 14.7 $\pm$ 1.4          |
| Methotrexate                                  | 7.4 | 65 $\pm$ 5          | -9.7 $\pm$ 0.3        | -17.8 $\pm$ 0.5       | 8.1 $\pm$ 0.2           |
|                                               | 6.5 | 88 $\pm$ 5          | -9.6 $\pm$ 0.1        | -17.4 $\pm$ 0.6       | 7.8 $\pm$ 0.6           |
| Aminopterin                                   | 7.4 | 65 $\pm$ 6          | -9.8 $\pm$ 0.1        | -18.1 $\pm$ 1.1       | 8.3 $\pm$ 1.0           |
|                                               | 6.5 | 71 $\pm$ 7          | -9.8 $\pm$ 0.1        | -16.8 $\pm$ 0.9       | 7.1 $\pm$ 0.9           |
| Pemetrexed                                    | 7.4 | 4.5 $\pm$ 1.9       | -11.4 $\pm$ 0.3       | -20.1 $\pm$ 0.7       | 8.7 $\pm$ 0.9           |
|                                               | 6.5 | 11 $\pm$ 2.5        | -10.9 $\pm$ 0.1       | -27.6 $\pm$ 0.2       | 16.7 $\pm$ 0.3          |
| hFR $\beta$ thermodynamic binding parameters  |     |                     |                       |                       |                         |
| Folic acid                                    | 7.4 | 2.7 $\pm$ 1.5       | -11.8 $\pm$ 0.4       | -26.3 $\pm$ 0.7       | 14.5 $\pm$ 0.9          |
|                                               | 6.5 | 23 $\pm$ 5          | -10.4 $\pm$ 0.1       | -10.3 $\pm$ 0.2       | -0.1 $\pm$ 0.2          |
| Methotrexate                                  | 7.4 | 40 $\pm$ 7          | -10.1 $\pm$ 0.1       | -16.4 $\pm$ 0.2       | 6.3 $\pm$ 0.3           |
|                                               | 6.5 | 332 $\pm$ 64        | -8.8 $\pm$ 0.1        | -6.2 $\pm$ 0.1        | -2.6 $\pm$ 0.2          |
| Aminopterin                                   | 7.4 | 144 $\pm$ 5*        | -9.3 $\pm$ 0.1        | -10.7 $\pm$ 0.5       | 1.4 $\pm$ 0.6           |
|                                               | 6.5 | ND                  | ND                    | ND                    | ND                      |
| Pemetrexed                                    | 7.4 | 54 $\pm$ 17         | -9.9 $\pm$ 0.2        | -8.0 $\pm$ 0.3        | -1.9 $\pm$ 0.5          |
|                                               | 6.5 | 323 <sup>†</sup>    | -8.9                  | -5.9                  | -3.0                    |

Unless noted, all measurements include SD from at least four trials. ND, not determined.

\*Two measurements.

<sup>†</sup>Single measurement.

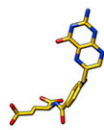

Folate Binding to hFR at Neutral pH

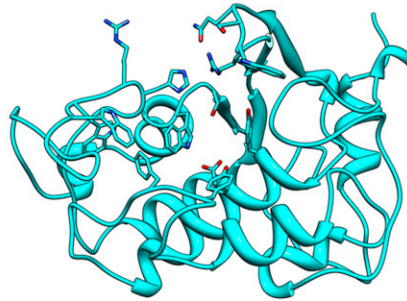

**Movie S1.** Transition from state I (apo) to state II (folate complex) of the hFR showing movement of residues that interact with folate.

[Movie S1](#)

Folate Dissociation

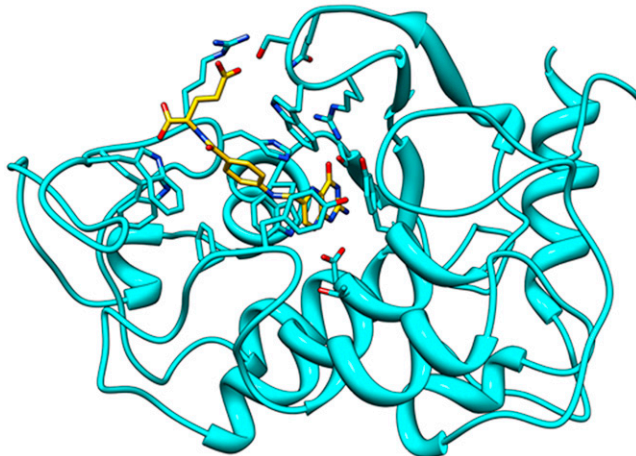

**Movie S2.** Transition from state II (folate complex) to state III (acidic) of the hFR showing movement of residues that interact with folate.

[Movie S2](#)

State II to State III Changes Highlight Movement  
of Conserved Histidines and Salt Bridge Formation

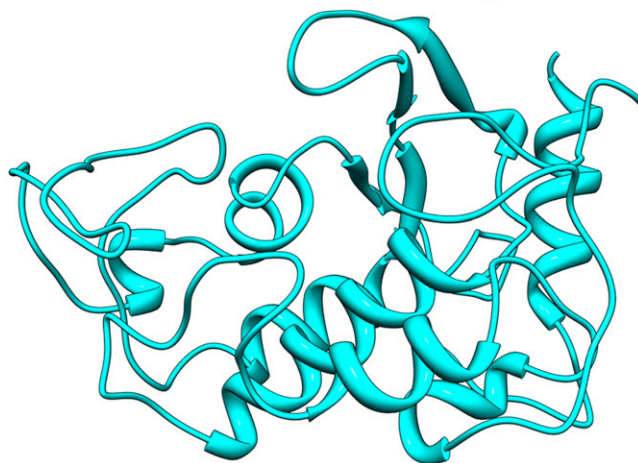

**Movie S3.** Transition from state II (folate complex) to state III (acidic) of the hFR showing movement of histidines and ionic interactions with R125.

[Movie S3](#)
